# Supplementary material
Source: HighWire-hosted journal article supplement (https://gut.bmj.com/content/gutjnl-2022-326917)
Supplement: inline-supplementary-material-8 [file inline-supplementary-material-8.pdf]

Table S2 List of oligonucleotides and antibodies

| Oligonucleotides                                  | SEQUENCE/SOURCE                        | IDENTIFIER                 |
|---------------------------------------------------|----------------------------------------|----------------------------|
| <i>Gapdh</i> (sense)                              | AAC TTT GGC ATT GTG<br>GAA GG          |                            |
| <i>Gapdh</i> (antisense)                          | ACA CAT TGG GGG<br>TAG GAA CA          |                            |
| <i>Card9</i> exon1F (sense)                       | CAG TGA CCC CAA CCT<br>GGT CAT         |                            |
| <i>Card9</i> exon3R (antisense)                   | TCT GCA GCT TCA TGA<br>CCT CTG TC      |                            |
| All fungi (sense) (ITS1, ITS2)                    | CTT GGT CAT TTA GAG<br>GAA GTA A       |                            |
| All fungi (antisense) (ITS1, ITS2)                | GCT GCG TTC TTC ATC<br>GAT GC          |                            |
| All bacteria (sense) (16s)                        | CGG TGA ATA CGT TCC<br>CGG             |                            |
| All bacteria (antisense) (16s)                    | TAC GGC TAC CTT GTT<br>ACG ACT T       |                            |
| All bacteria (Probe) (16s)                        | 6FAM-CTT GTA CAC<br>ACC GCC CGT C-MGB  |                            |
| <i>Il-23</i> mouse (sense)                        | AGC GGG ACA TAT GAA<br>TCT ACT AAG AGA |                            |
| <i>Il-23</i> mouse (antisense)                    | GTC CTA GTA GGG<br>AGG TGT GAA GTT G   |                            |
| <i>Lcn2</i> mouse                                 | Quantitect                             | Mn_Lcn2_1_SG<br>QT00113407 |
| <i>Cxcr2</i> mouse (sense)                        | CTC ACA AAC AGC GTC<br>GTA GAA C       |                            |
| <i>Cxcr2</i> mouse (antisense)                    | AGG GCA TGC CAG<br>AGC TAT AAT         |                            |
| <i>S100a8</i> mouse (sense)                       | TCA AGA CAT CGT TTG<br>AAA GGA AAT C   |                            |
| <i>S100a8</i> mouse (antisense)                   | GGT AGA CAT CAA TGA<br>GGT TGC TC      |                            |
| <b>Antibodies</b>                                 |                                        |                            |
| CARD9 (A-8)                                       | Santa Cruz Biotechnology               | Cat# sc-374569             |
| $\beta$ -ACTIN (D6A8)                             | Cell Signaling Technology              | Cat# 8457S                 |
| APC-labeled anti-mouse TCR $\gamma\delta$ (GL3)   | eBioscience                            | Cat# 17-5711-82            |
| anti-CD16/32 (93)                                 | eBioscience                            | Cat# 14-0161-85            |
| PerCP5.5-labeled anti-mouse CD45 (30-F11)         | eBioscience                            | Cat# 45-0451-82            |
| FITC-labeled anti-mouse CD3 $\epsilon$ (145-2C11) | eBioscience                            | Cat# 11-0031-85            |
| BV605-labeled anti-mouse CD8 $\alpha$ (53-6.7)    | BioLegend                              | Cat# 100744                |
| PE-labeled anti-mouse CD4 (RM4-5)                 | eBioscience                            | Cat# 12-0042-83            |
| AF700-labelled CD19 (6D5)                         | BioLegend                              | Cat# 115528                |
| PE-labelled CD11c (N418)                          | BioLegend                              | Cat# 117308                |
| APC-labelled F4/80 (BM8)                          | BioLegend                              | Cat# 123116                |
| AF700-labelled CD11b (M1/70)                      | BioLegend                              | Cat# 101222                |
| APCFire750-labelled CD45 (30-F11)                 | BioLegend                              | Cat# 103154                |
| PerCP5.5-labelled Ly6G (1A8)                      | BioLegend                              | Cat# 127616                |
| PE-labelled CD11b (M1/70)                         | eBioscience                            | Cat# 12-0112-82            |
| BV421-labelled CD62L (MEL-14)                     | BioLegend                              | Cat# 104424                |
